# Supplementary material for: Synthesis and in vitro assessment of gold nanoparticles conjugated with extracts, sterols and pure compounds derived from marine sponges from the Indian and Pacific Oceans
Source: Royal Society of Chemistry journal article supplement (doi:10.1039/d4ra04068f), 2024-01-01
Supplement: d4ra04068f1.pdf [file d4ra04068f1.pdf]

## SUPPLEMENTARY INFORMATION

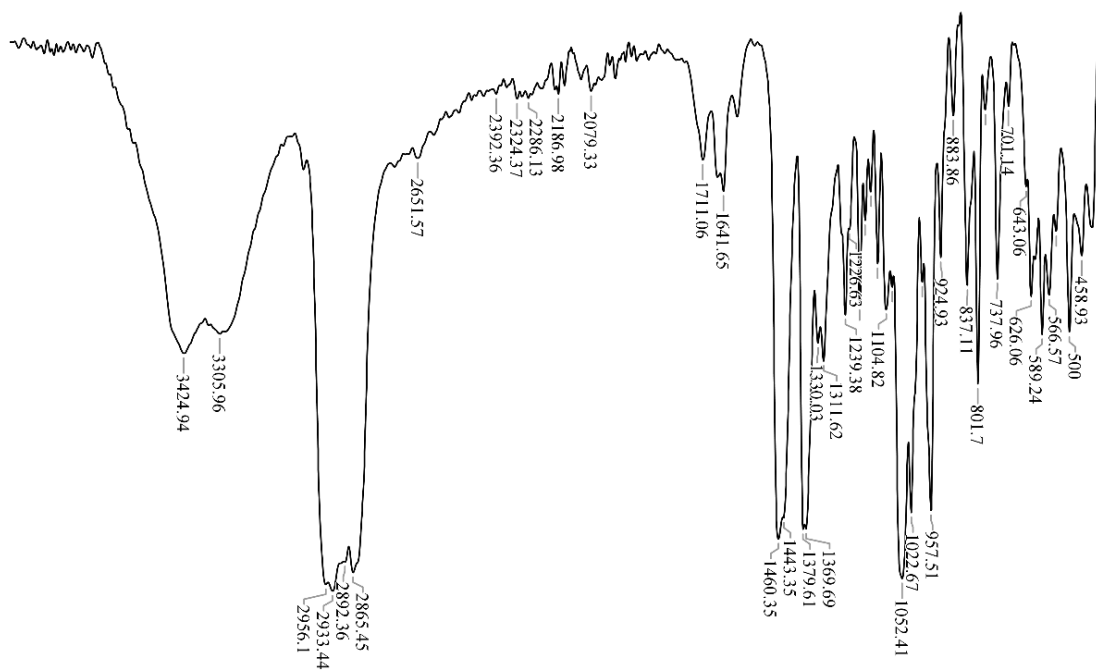

**Fig. 1S.** FT-IR spectrum of JC-2

A

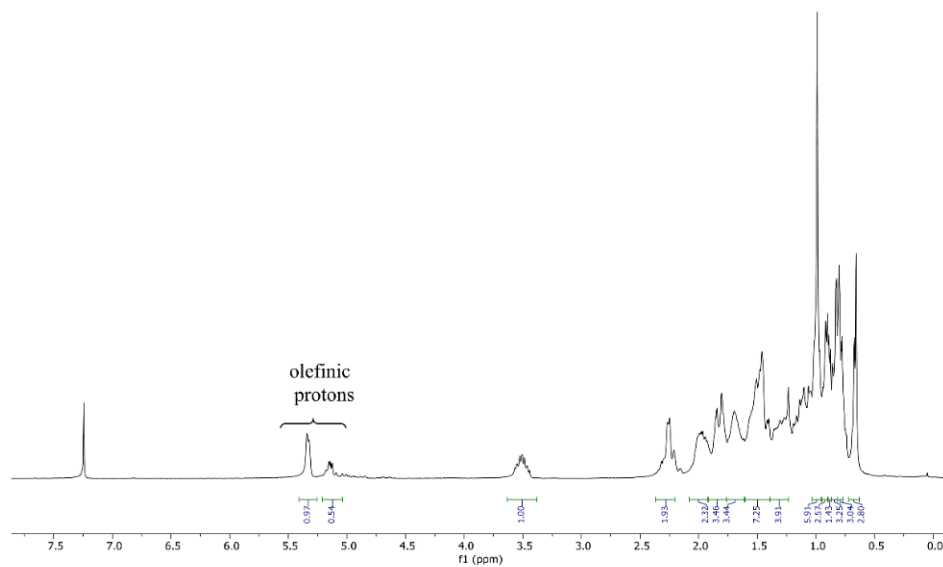

B

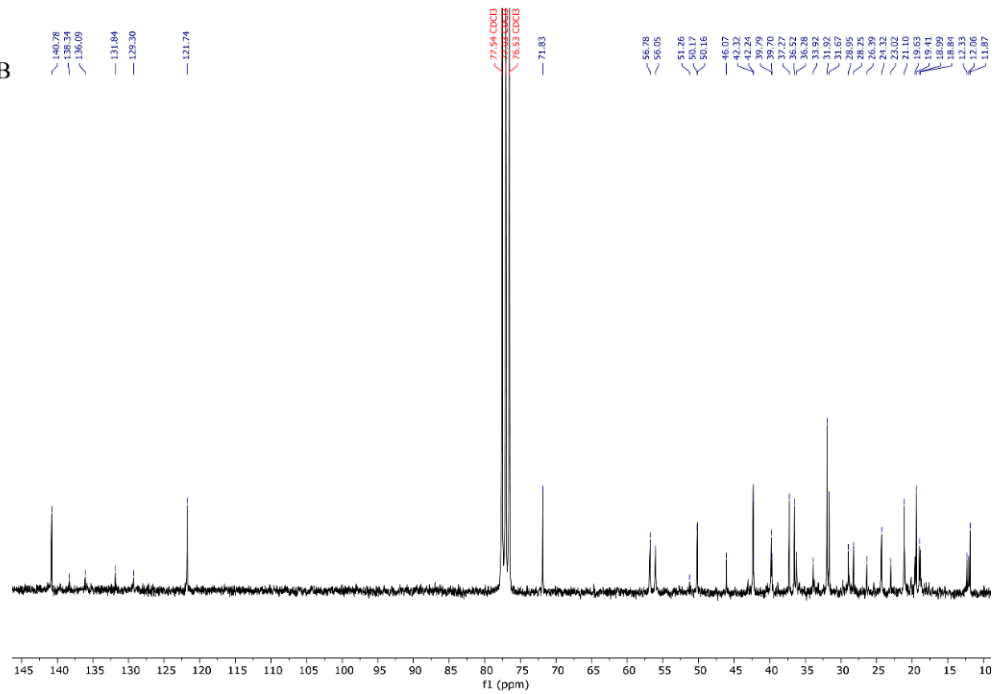

**Fig. 2S.** (A)  $^1\text{H}$ - and (B)  $^{13}\text{C}$ - NMR spectra of JC-2

**Table 1S.**  $^{13}\text{C}$ -NMR data of JC-2 in comparison with  $\beta$ -sitosterol and Stigmasterol

| Carbon number | Type of carbon atom | $^{13}\text{C}$ ( $\delta$ , ppm) of JC-2 | $^{13}\text{C}$ ( $\delta$ , ppm) [1]) |              |
|---------------|---------------------|-------------------------------------------|----------------------------------------|--------------|
|               |                     |                                           | $\beta$ -sitosterol                    | Stigmasterol |
| 1             | CH <sub>2</sub>     | 37.27                                     | 37.2                                   | 37.2         |
| 2             | CH <sub>2</sub>     | 31.67                                     | 31.6                                   | 31.6         |
| 3             | CH                  | 71.83                                     | 71.8                                   | 71.8         |
| 4             | CH <sub>2</sub>     | 42.32                                     | 42.27                                  | 42.27        |
| 5             | C                   | 140.78                                    | 140.7                                  | 140.7        |
| 6             | CH                  | 121.74                                    | 121.7                                  | 121.7        |
| 7             | CH <sub>2</sub>     | 31.9                                      | 31.9                                   | 31.9         |
| 8             | CH                  | 31.9                                      | 31.9                                   | 31.9         |
| 9             | CH                  | 50.16                                     | 50.1                                   | 50.1         |
| 10            | C                   | 36.52                                     | 36.5                                   | 36.5         |
| 11            | CH <sub>2</sub>     | 21.10                                     | 21.06                                  | 21.06        |
| 12            | CH <sub>2</sub>     | 39.79                                     | 39.8                                   | 39.7         |
| 13            | C                   | 42.32                                     | 42.19                                  | 42.19        |
| 14            | CH                  | 56.78                                     | 56.7                                   | 56.8         |
| 15            | CH <sub>2</sub>     | 24.32                                     | 24.3                                   | 24.4         |
| 16            | CH <sub>2</sub>     | 28.25                                     | 28.2                                   | 28.9         |
| 17            | CH                  | 56.05                                     | 56.0                                   | 55.9         |
| 18            | CH <sub>3</sub>     | 11.87                                     | 11.97                                  | 12.04        |
| 19            | CH <sub>3</sub>     | 19.63                                     | 19.4                                   | 19.4         |
| 20            | CH                  | 36.28                                     | 36.1*                                  | 40.5*        |
| 21            | CH <sub>3</sub>     | 19.41                                     | 18.8                                   | 21.09        |
| 22            | CH <sub>2</sub>     | 33.92/138.34                              | 33.9*                                  | 138.3*       |
| 23            | CH <sub>2</sub>     | 26.39/129.3                               | 26.0*                                  | 129.2*       |
| 24            | CH                  | 46.07/51.26                               | 45.8*                                  | 51.2*        |
| 25            | CH                  | 28.95                                     | 29.1                                   | 31.9         |
| 26            | CH <sub>3</sub>     | 18.99                                     | 19.02                                  | 21.2         |
| 27            | CH <sub>3</sub>     | 18.84                                     | 19.8                                   | 18.97        |
| 28            | CH <sub>2</sub>     | 23.02                                     | 23.0                                   | 25.4         |
| 29            | CH <sub>3</sub>     | 12.06                                     | 11.8                                   | 12.3         |

\* Main differences between the two compounds<sup>1</sup>

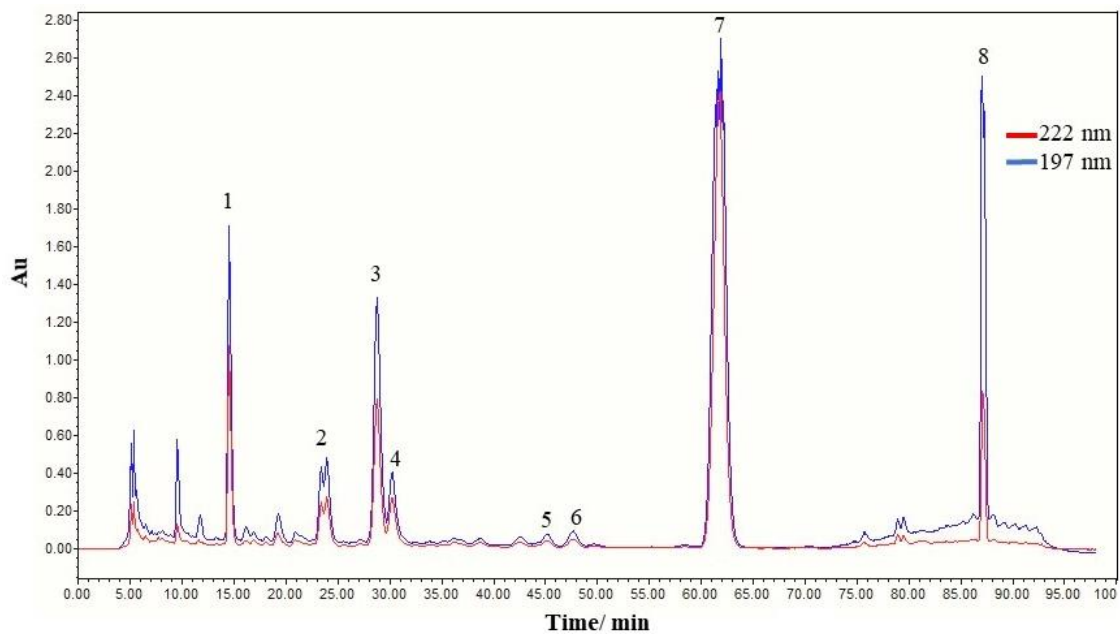

**Fig. 3S.** HPLC chromatogram of fraction JDH (15-21) showing peaks 1-8.

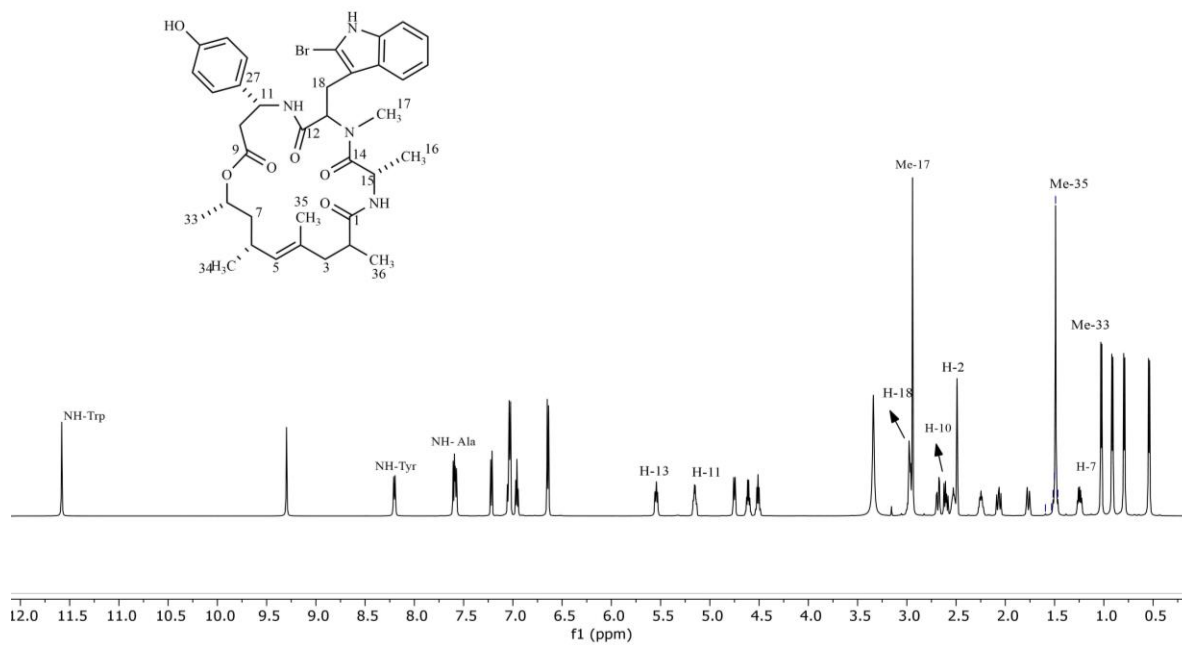

**Fig. 4S.**  $^1\text{H-NMR}$  spectrum of isolate 7 (peak 7) in  $\text{DMSO-}d_6$  (600 MHz) showing main signals for jaspamide.

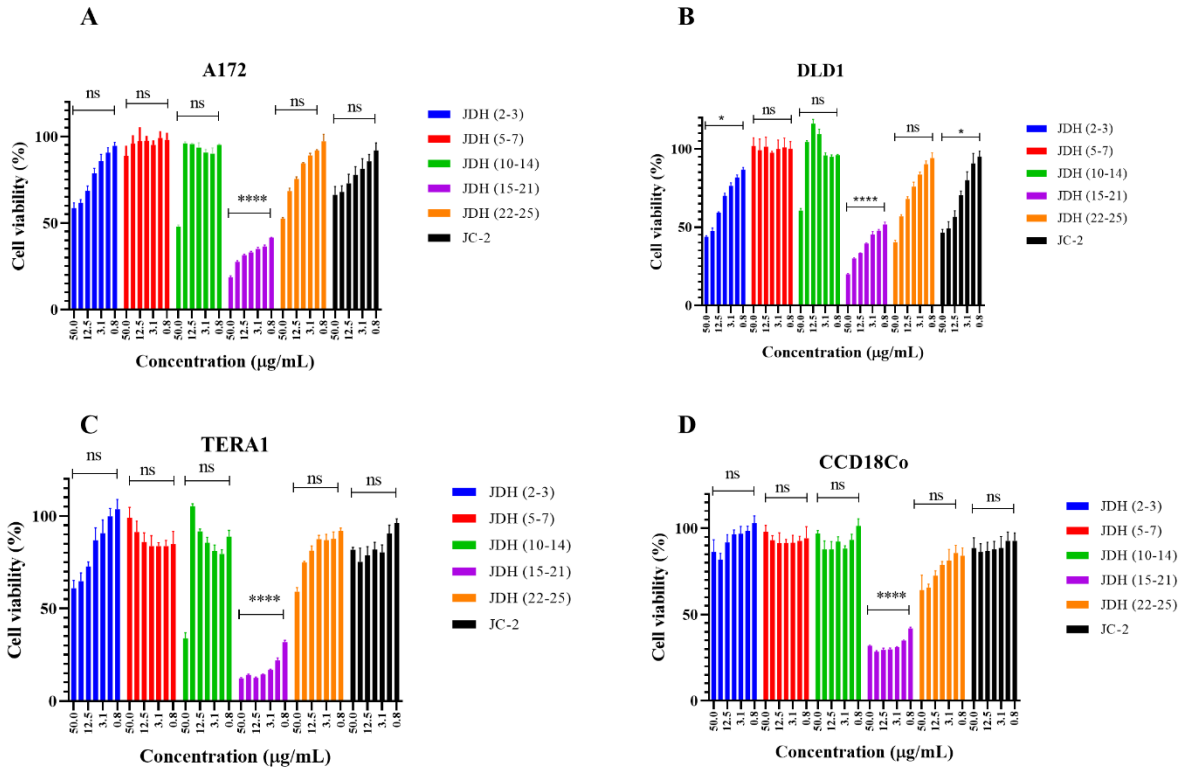

**Fig. 5S** Cell viability (%) of hexane fractions and JC-2 on A172 (A) DLD1 (B) TERA1 (C) and CCD18Co (D) cell lines. Results are presented as mean values  $\pm$  standard deviations ( $n = 3$ ). Asterisks represent significant differences between the fractions and control (DMSO 0.7%); \* $p < 0.05$  and \*\*\*\*  $p < 0.001$  were considered statistically significant, ns – non significant.

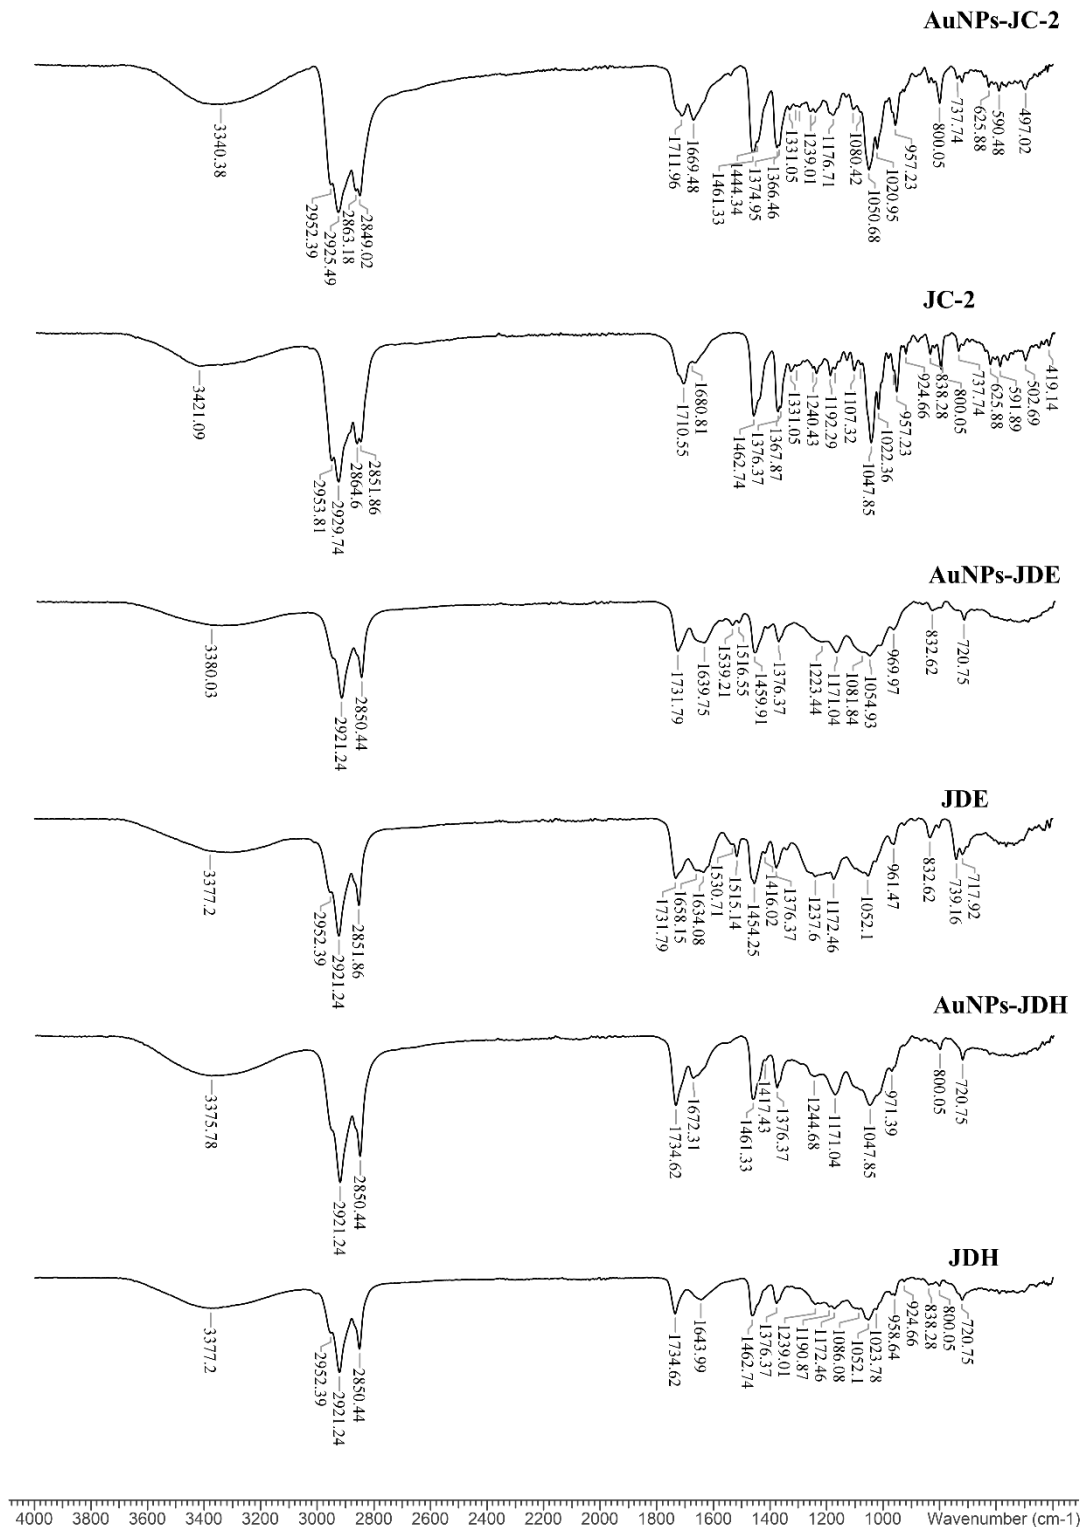

**Fig. 6S** FTIR spectra of native JDH, JDE and JC-2 and synthesized gold nanoparticles (AuNPs-JDH, AuNPs-JDE and AuNPs-JC-2).

## REFERENCE

[1] J.-M.C. Cayme, C.Y. Ragasa, Structure elucidation of  $\beta$ -stigmasterol and  $\beta$ -sitosterol from *Sesbania grandiflora* [Linn.] Pers. and  $\beta$ -carotene from *Heliotropium indicum* Linn. by NMR spectroscopy, *Kimika*, 20 (2004) 5-12.
